# Supplementary material for: Immune selection suppresses the emergence of drug resistance in malaria parasites but facilitates its spread
Source: PubMed Central journal article supplement (PMC8321109; doi:10.1371/journal.pcbi.1008577), 2021-07-19
Supplement: pcbi.1008577.s002.pdf [file pcbi.1008577.s002.pdf]

**Table S1.** Table of symbols used in the supplemental methods

| <b>Symbol</b> | <b>Value</b>         | <b>Meaning</b>                                                |
|---------------|----------------------|---------------------------------------------------------------|
| $K$           | 8500000              | Maximum number of RBCs                                        |
| $m_u$         | 0.025                | Mortality rate of uninfected RBCs                             |
| $m_M$         | 0.2                  | Mortality rate of infected RBCs                               |
| $U$           | varies               | Count of all uninfected RBCs                                  |
| $M$           | varies               | Count of all infected RBCs                                    |
| $p$           | 370000               | Daily RBC production up to $K$                                |
| $\beta$       | 8.75                 | Bystander killing per infected RBC                            |
| $\gamma$      | 0.51                 | Gametocyte daily background mortality percent                 |
| $g_i$         | 0.00003              | Innate immunity growth rate per time step                     |
| $\nu_i$       | 0.85                 | Innate immunity decay rate per time step                      |
| $g_a$         | Pois(0.85)           | Adaptive immunity growth rate (property of individual hosts)  |
| $\nu_a$       | 0.001                | Adaptive immunity decay rate per time step                    |
| $k_i$         | 0.6                  | Innate immunity kill rate per time step                       |
| $k_a$         | 0.8                  | Adaptive immunity kill rate per time step                     |
| $\zeta$       | 1000                 | Adaptive immunity shape constant                              |
| $\iota$       | 0.001                | Initial value for adaptive immunity                           |
| $\tau$        | 0.15                 | Antigenic escape                                              |
| $\varphi$     | 180                  | Antigenic shape constant                                      |
| $\delta$      | 8                    | Decay of adaptive immunity due to antigenic drift             |
| $\eta$        | 10000                | Saturation shape constant                                     |
| $\alpha$      | 0.85                 | Maximum immune efficacy when immunity is saturated            |
| $\chi$        | 0.5                  | Cross-reactivity between strains                              |
| $\chi_{\max}$ | 0.5                  | Maximum immune contribution from a cross-reactive strain      |
| $\vartheta$   | $2.4 \times 10^{-7}$ | Infection rate per merozoite                                  |
| $\omega$      | 0.999                | Drug efficacy as daily mortality rate for sensitive parasites |
