# Supplementary material for: Immune selection suppresses the emergence of drug resistance in malaria parasites but facilitates its spread
Source: PubMed Central journal article supplement (PMC8321109; doi:10.1371/journal.pcbi.1008577), 2021-07-19
Supplement: pcbi.1008577.s003.pdf [file pcbi.1008577.s003.pdf]

**Table S2.** List of parameters and default values

| <b>Parameter</b>                                              | <b>Value</b>                       |
|---------------------------------------------------------------|------------------------------------|
| Host population size                                          | 100                                |
| Minimum RBC count                                             | 2000000                            |
| Host maximum parasitemia                                      | Pois(11%)                          |
| Maximum host lifespan                                         | 500 days                           |
| Host daily background mortality rate                          | 0.001                              |
| Gametocyte maturation time                                    | 2 days                             |
| Merozoite burst size                                          | 10                                 |
| Instantaneous merozite mortality                              | 20%                                |
| Liver stage delay                                             | 7 days                             |
| Transmission investment                                       | 5%                                 |
| Sporozoite burst size                                         | 5                                  |
| In vector survival rate                                       | 1%                                 |
| Number of sporozoites injected into host                      | Pois(12)                           |
| Number of genomic loci associated with fitness and resistance | 2                                  |
| Genomic mutation rate                                         | 0.000025 per locus per replication |
| Resistance mu relative growth rate                            | 0.4                                |
| Strain mutation rate                                          | 0.00001 per replication            |
| Vector lifespan                                               | 20 days                            |
| Feed frequency                                                | 3 days                             |
| Infected feed delay                                           | 1 day                              |
| Treatment rate of symptomatic hosts                           | 0.3                                |
| Threshold density for symptomatic infection                   | 5000 merozoites/ $\mu$ L           |
| Treatment duration                                            | 3 days                             |
